# Supplementary material for: Proposal of a New Procedure for Assessing the Performance of the Self-Healing Polymer-Modified Asphalt Binders with an Integral Vision of the Damage Characteristic Curves
Source: Preprints.org preprint supplement (doi:10.20944/preprints202406.1798.v1), 2024-06-26
Supplement: Supplementary file 1 [file supplementary]

Supplementary materials.


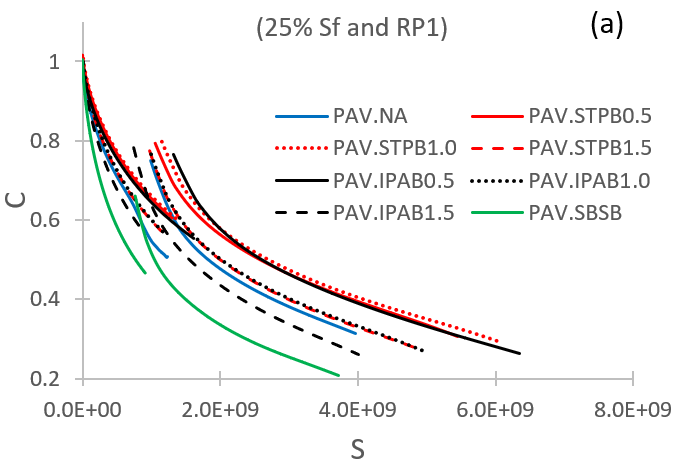

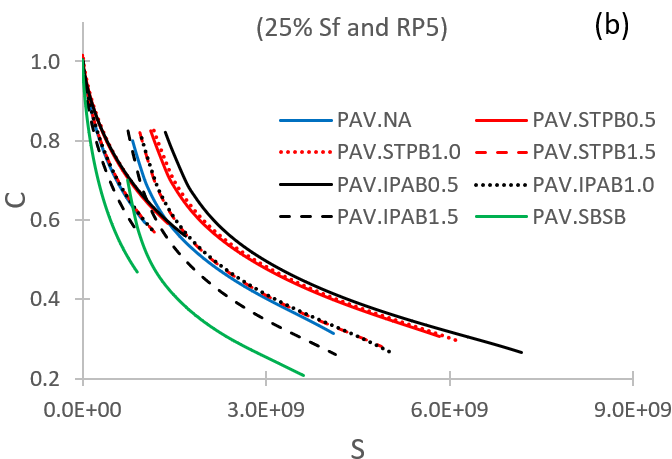


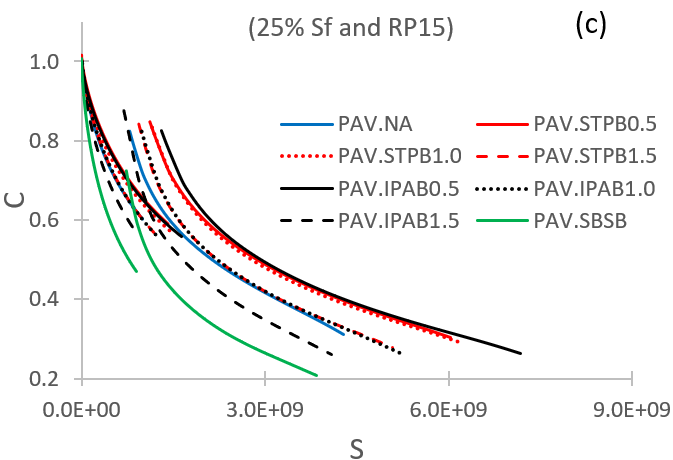

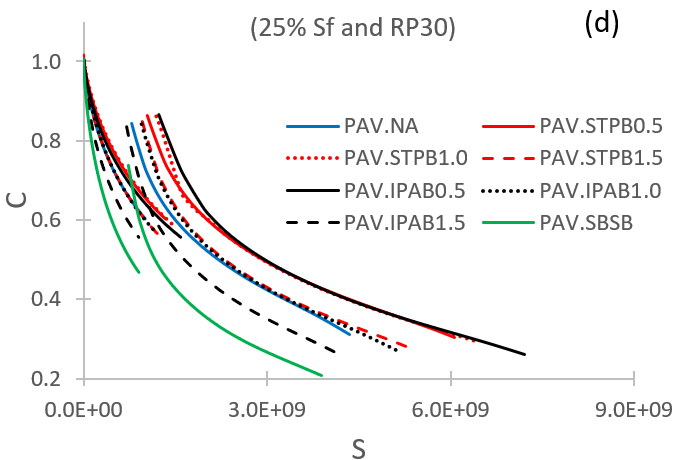


Figure S 1. DCCs related to LASH tests of all bitumens at 25% of : (a) RP1; (b) RP5; (c) RP15; (d) RP30.


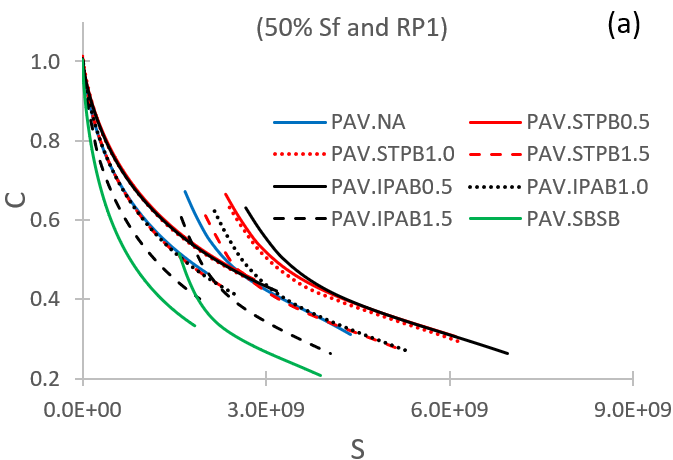

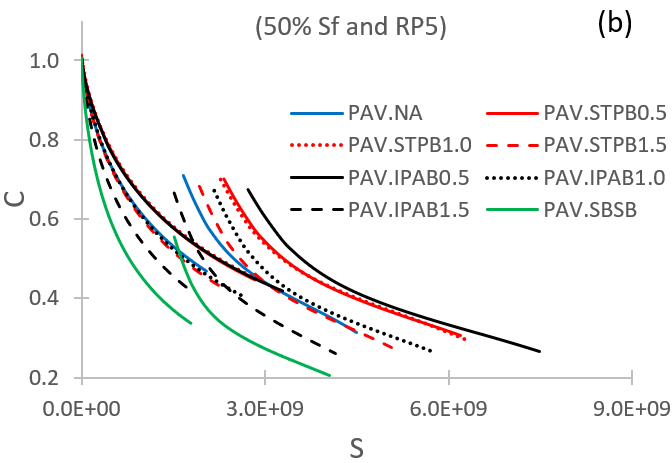


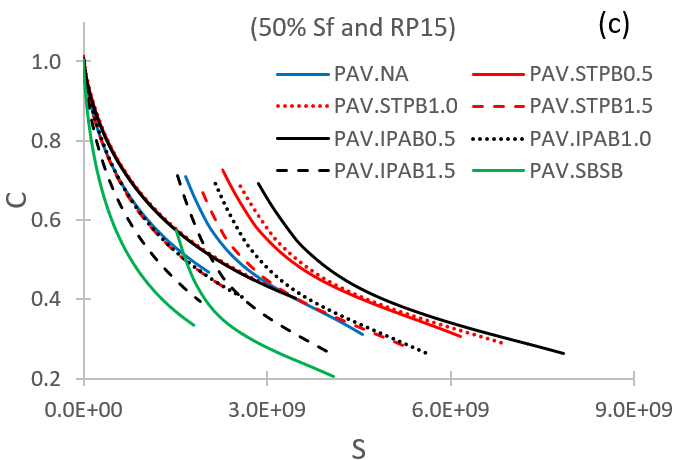

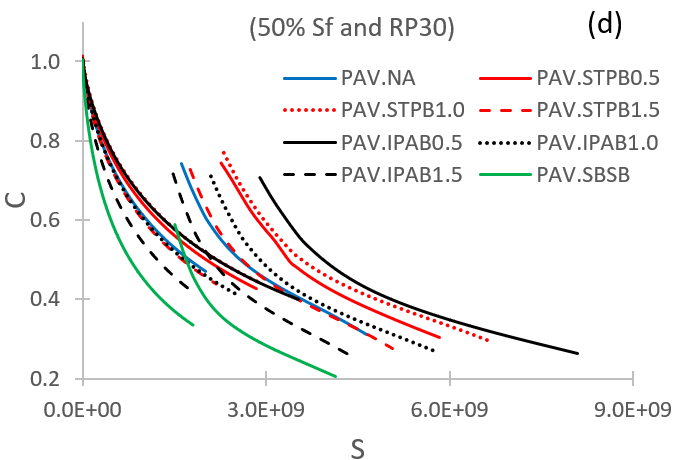


Figure S 2. DCCs related to LASH tests of all bitumens at 50% of : (a) RP1; (b) RP5; (c) RP15; (d) RP30.


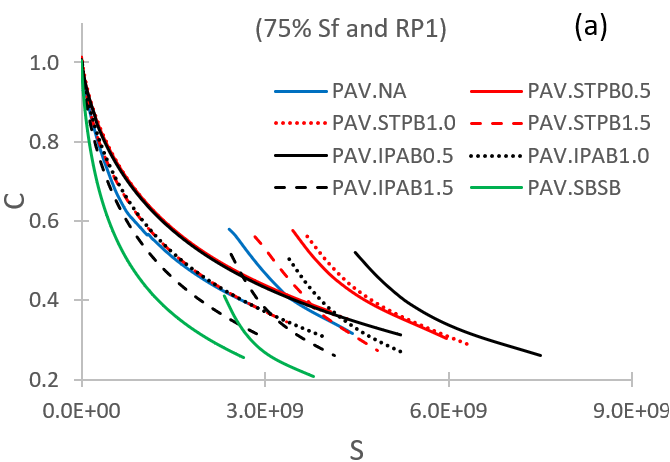

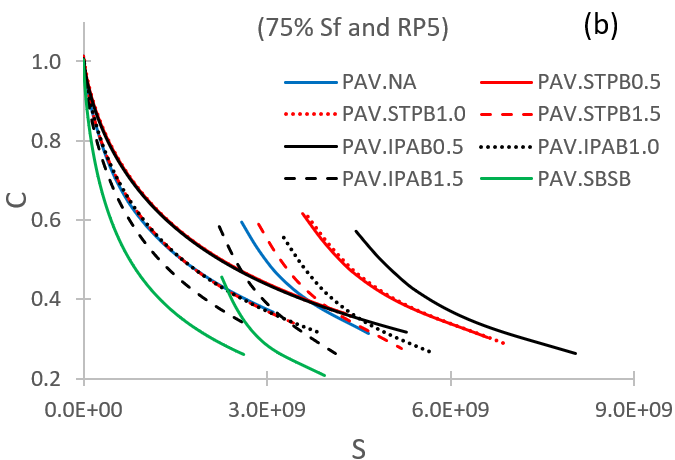


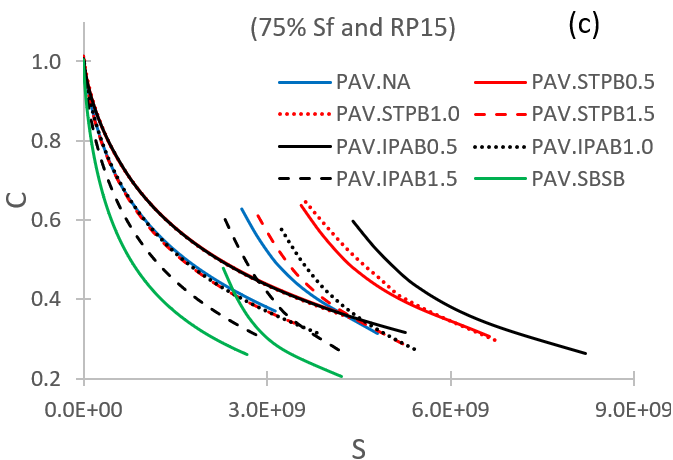

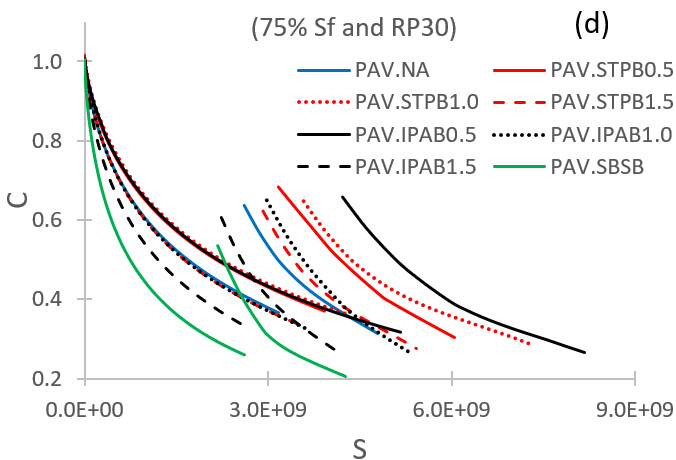


Figure S 3. DCCs related to LASH tests of all bitumens at 75% of : (a) RP1; (b) RP5; (c) RP15; (d) RP30.


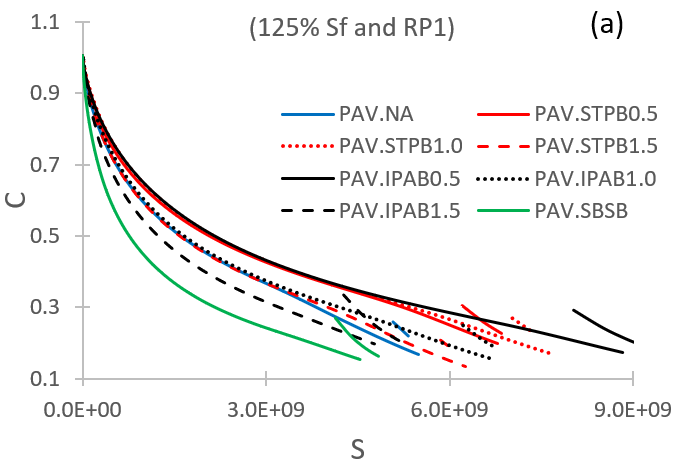

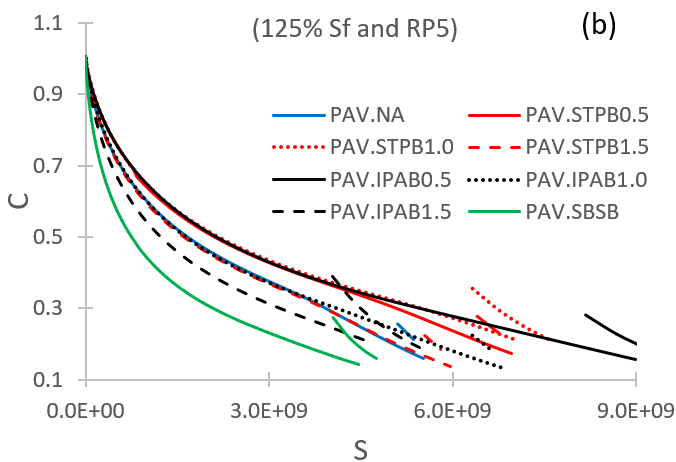


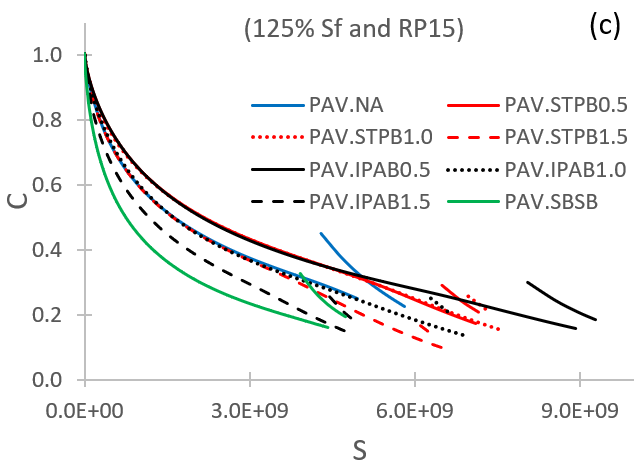

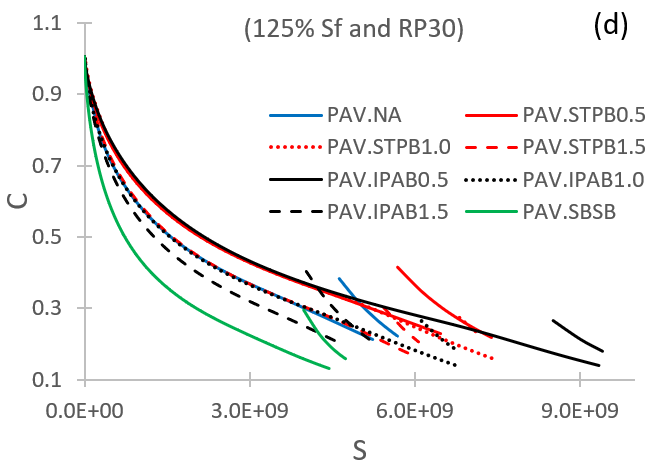


Figure S 4. DCCs related to LASH tests of all bitumens at 125% of : (a) RP1; (b) RP5; (c) RP15; (d) RP30.


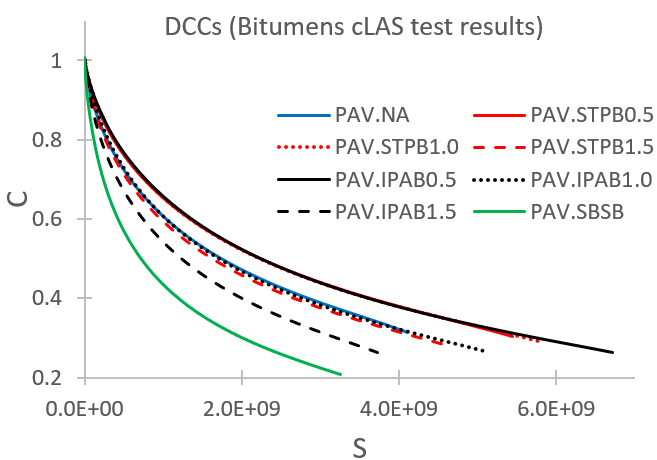


Figure S 5 DCCs of bitumens linked with cLAS test results.


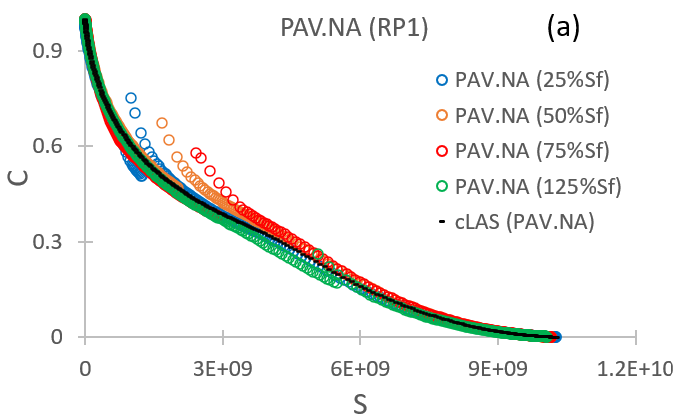

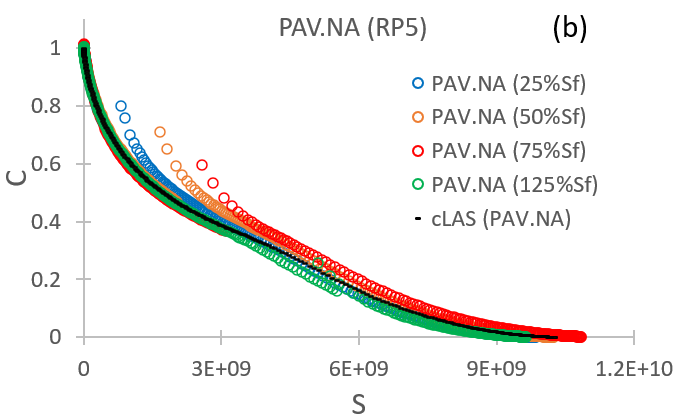


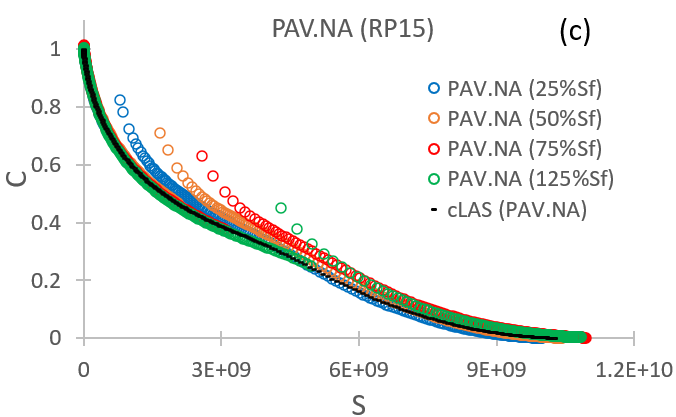

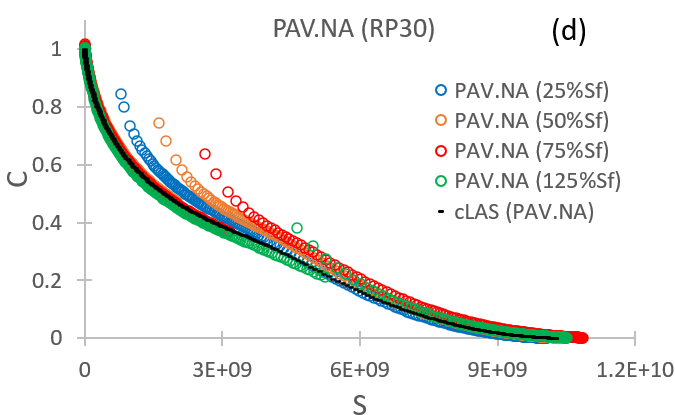


Figure S 6 DCCs of NA related to LASH (25%, 50%, 75%, and 125% of Sf) at: (a) RP1; (b) RP5; (c) RP15; (d) RP 30 (including the DCC of cLAS as reference).


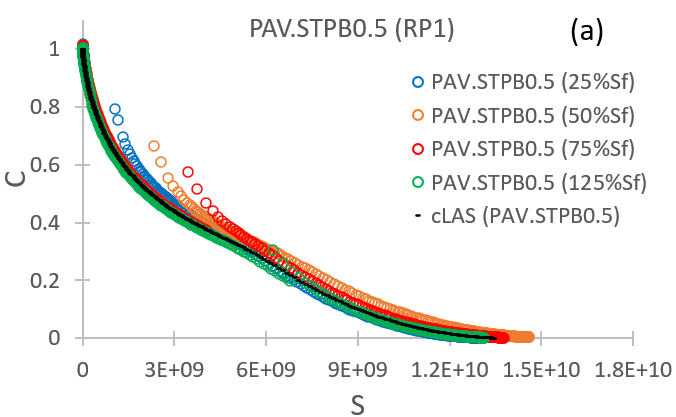

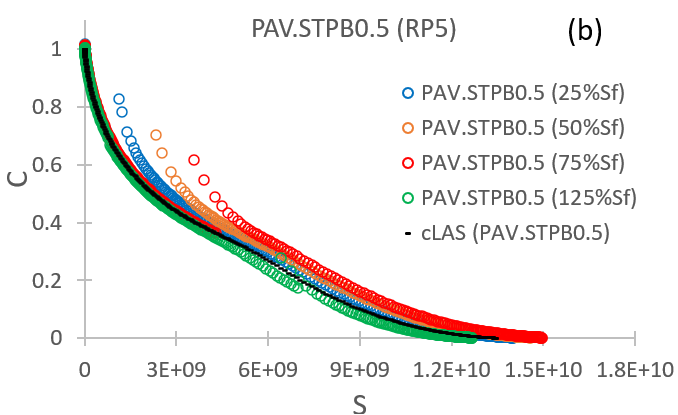


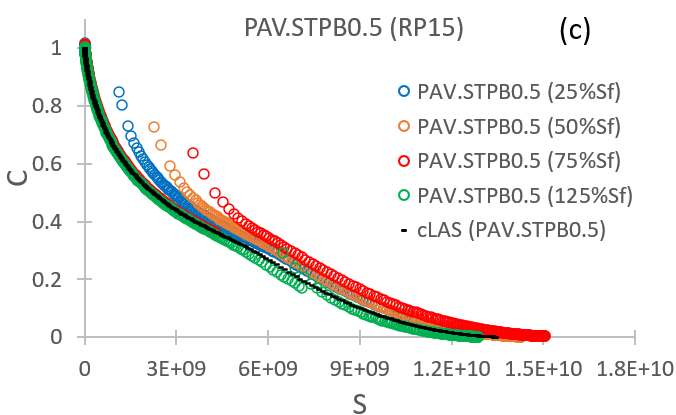

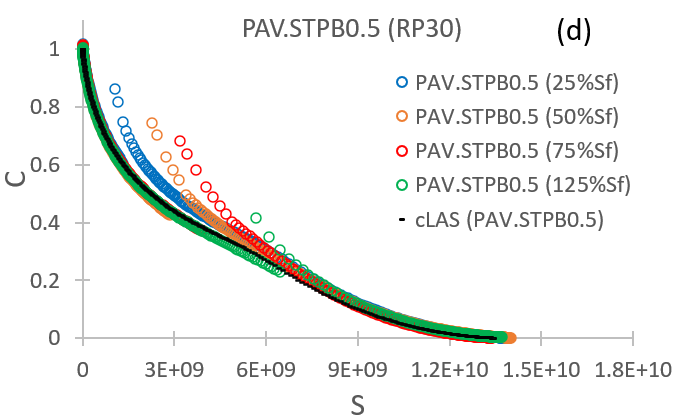


Figure S 7 DCCs of STPB0.5 related to LASH (25%, 50%, 75%, and 125% of Sf) at: (a) RP1; (b) RP5; (c) RP15; (d) RP 30 (including the DCC of cLAS as reference).


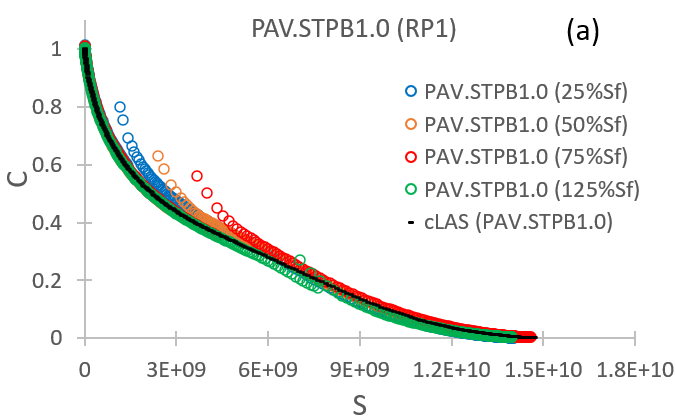

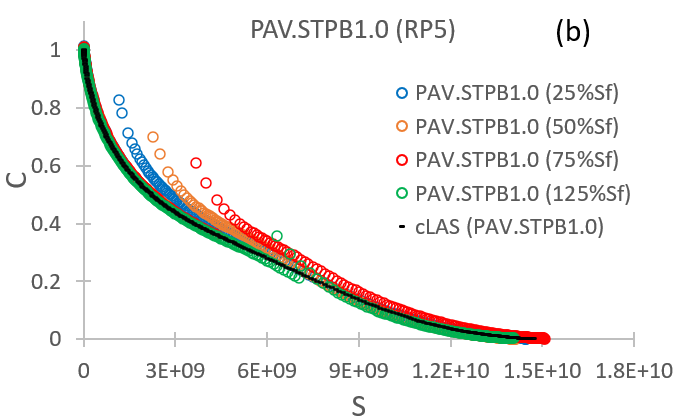


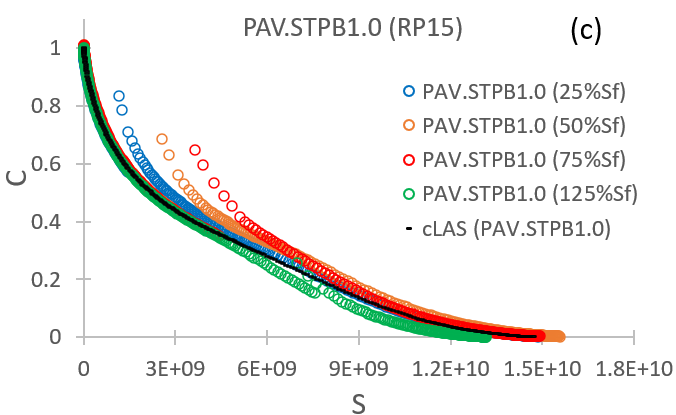

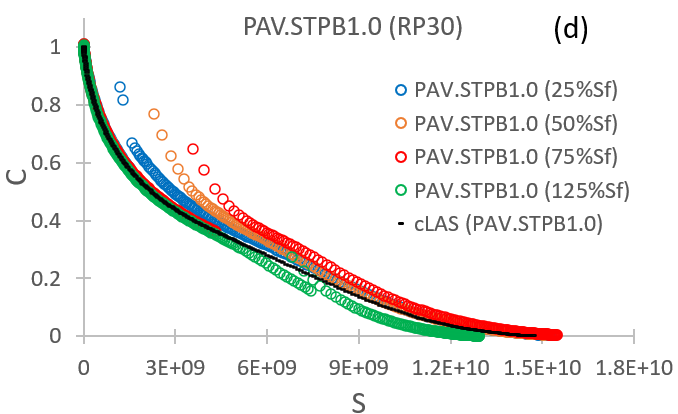


Figure S 8 DCCs of STPB1.0 related to LASH (25%, 50%, 75%, and 125% of Sf) at: (a) RP1; (b) RP5; (c) RP15; (d) RP 30 (including the DCC of cLAS as reference).


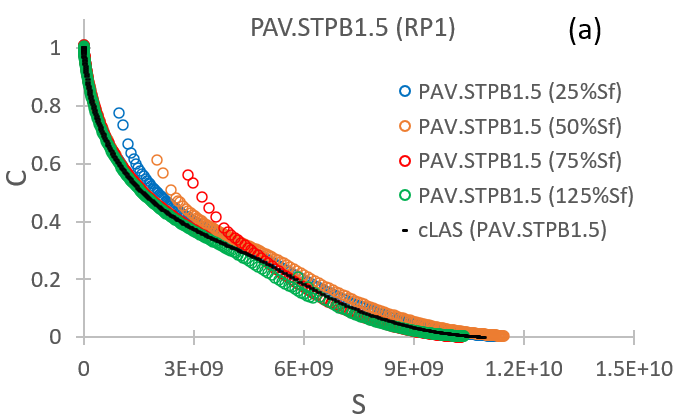

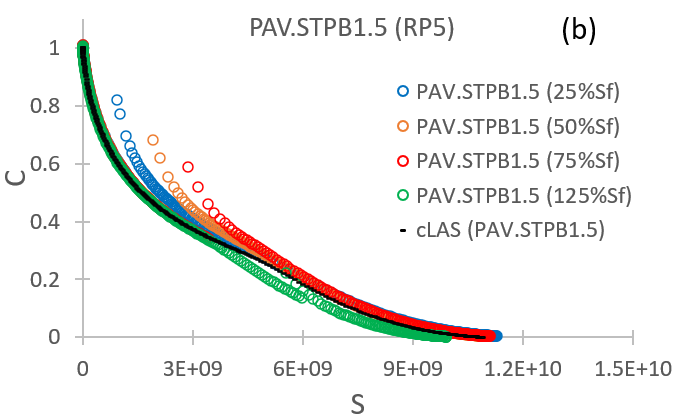


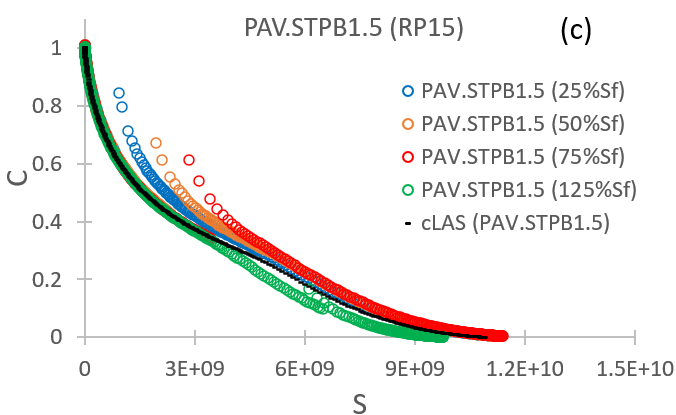

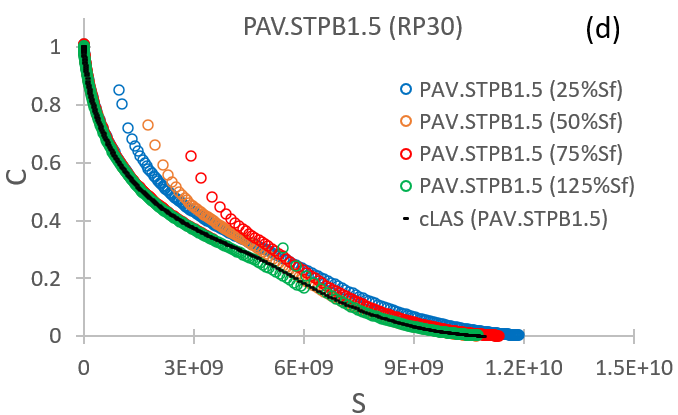


Figure S 9 DCCs of STPB1.5 related to LASH (25%, 50%, 75%, and 125% of Sf) at: (a) RP1; (b) RP5; (c) RP15; (d) RP 30 (including the DCC of cLAS as reference).


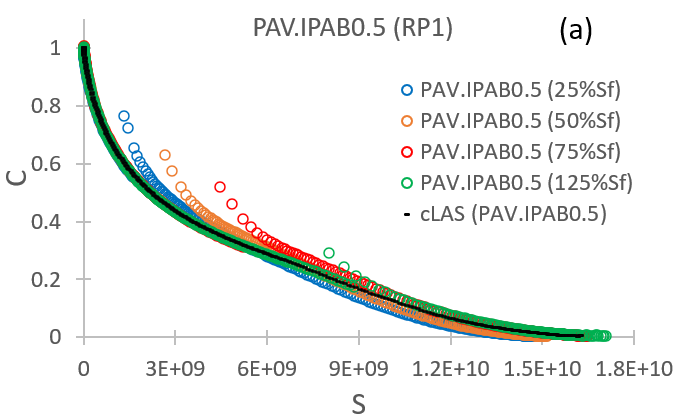

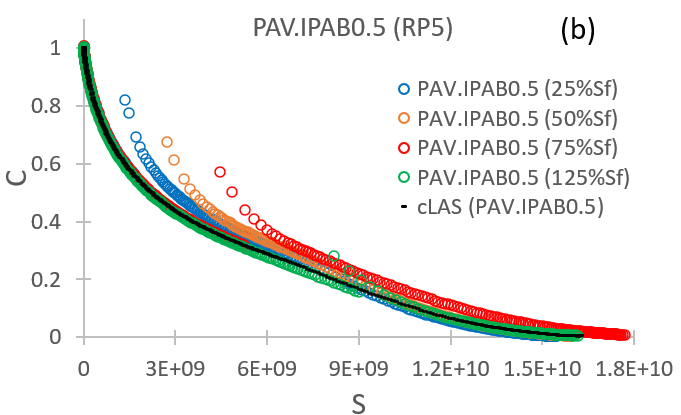


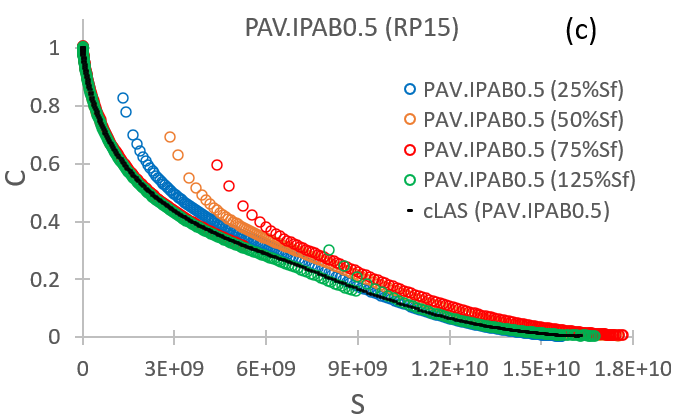

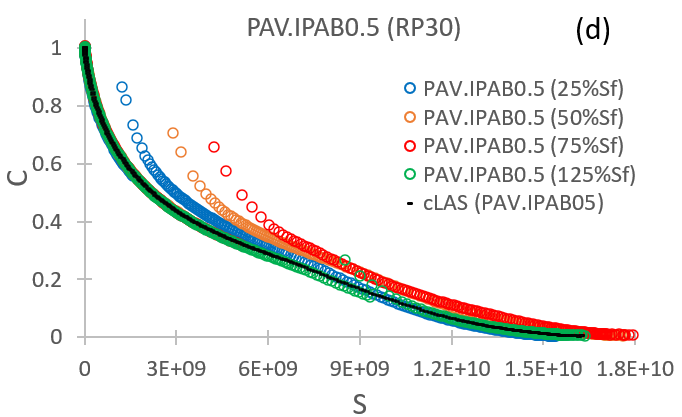


Figure S 10 DCCs of IPAB0.5 related to LASH (25%, 50%, 75%, and 125% of Sf) at: (a) RP1; (b) RP5; (c) RP15; (d) RP 30 (including the DCC of cLAS as reference).


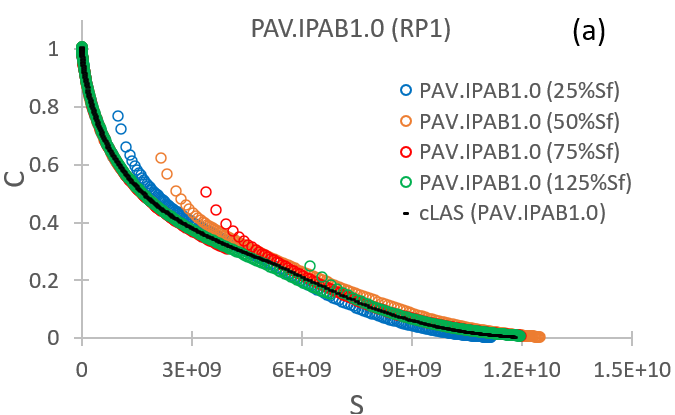

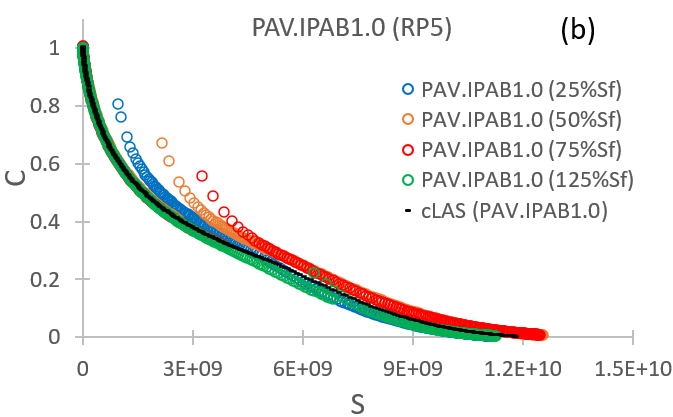


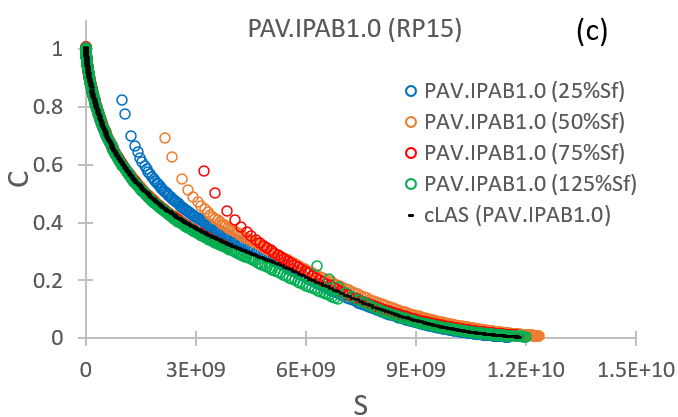

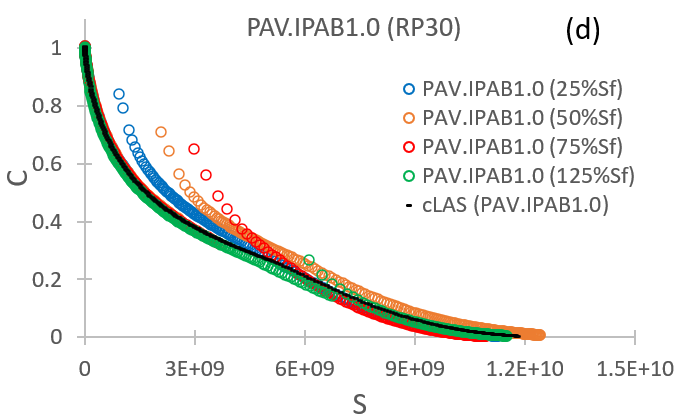


Figure S 11 DCCs of IPAB1.0 related to LASH (25%, 50%, 75%, and 125% of Sf) at: (a) RP1; (b) RP5; (c) RP15; (d) RP 30 (including the DCC of cLAS as reference).


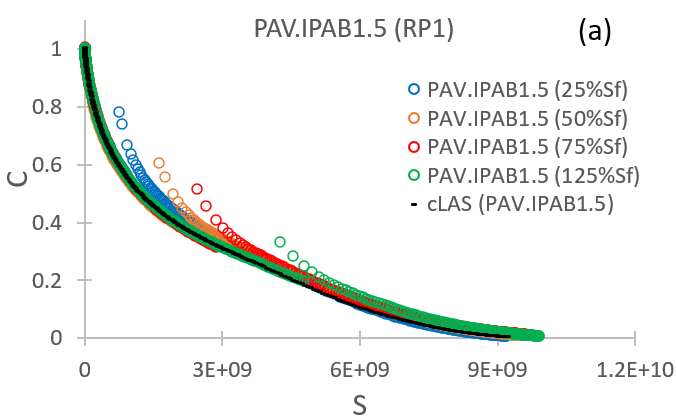

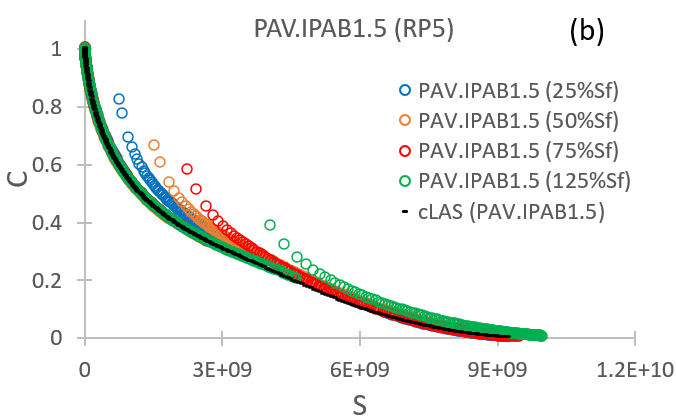


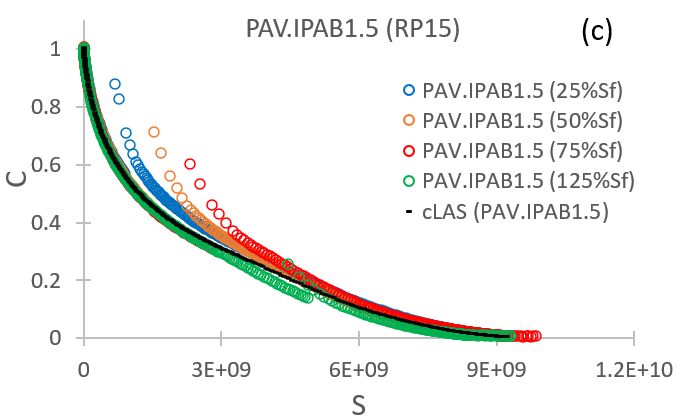

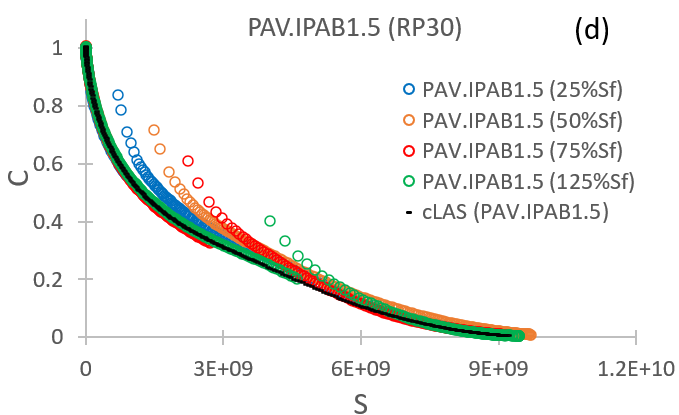


Figure S 12 DCCs of IPAB1.0 related to LASH (25%, 50%, 75%, and 125% of Sf) at: (a) RP1; (b) RP5; (c) RP15; (d) RP 30 (including the DCC of cLAS as reference).


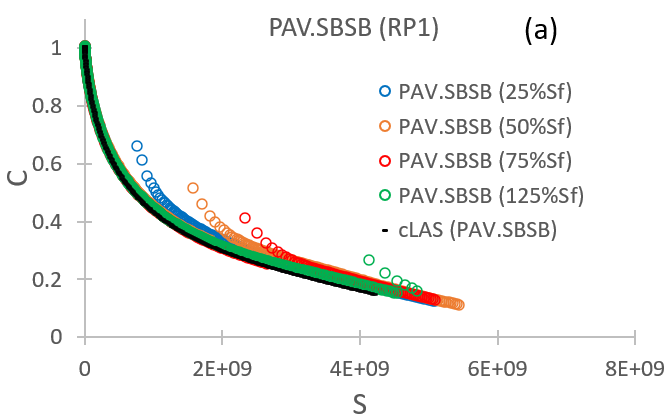

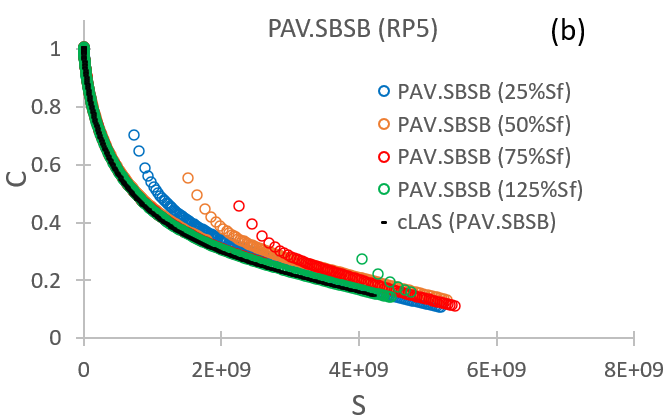


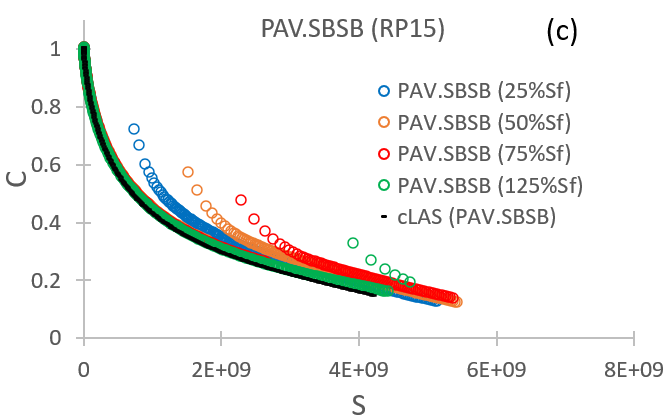

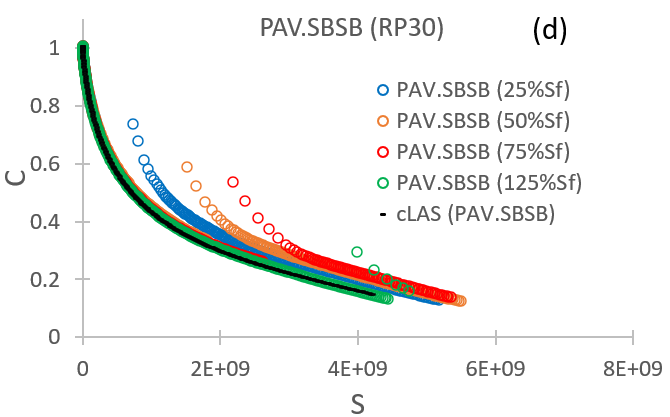


Figure S 13 DCCs of IPAB1.0 related to LASH (25%, 50%, 75%, and 125% of Sf) at: (a) RP1; (b) RP5; (c) RP15; (d) RP 30 (including the DCC of cLAS as reference).
